# Supplementary material for: Plasma exosomes from patients with coronary artery disease promote atherosclerosis via impairing vascular endothelial junctions
Source: PubMed Central journal article supplement — Sci Rep. 2024 Nov 30;14:29813. doi: 10.1038/s41598-024-81352-8 (PMC11608243; doi:10.1038/s41598-024-81352-8), 2024-11-30
Supplement: 41598_2024_81352_MOESM2_ESM.pdf [file 41598_2024_81352_MOESM2_ESM.pdf]

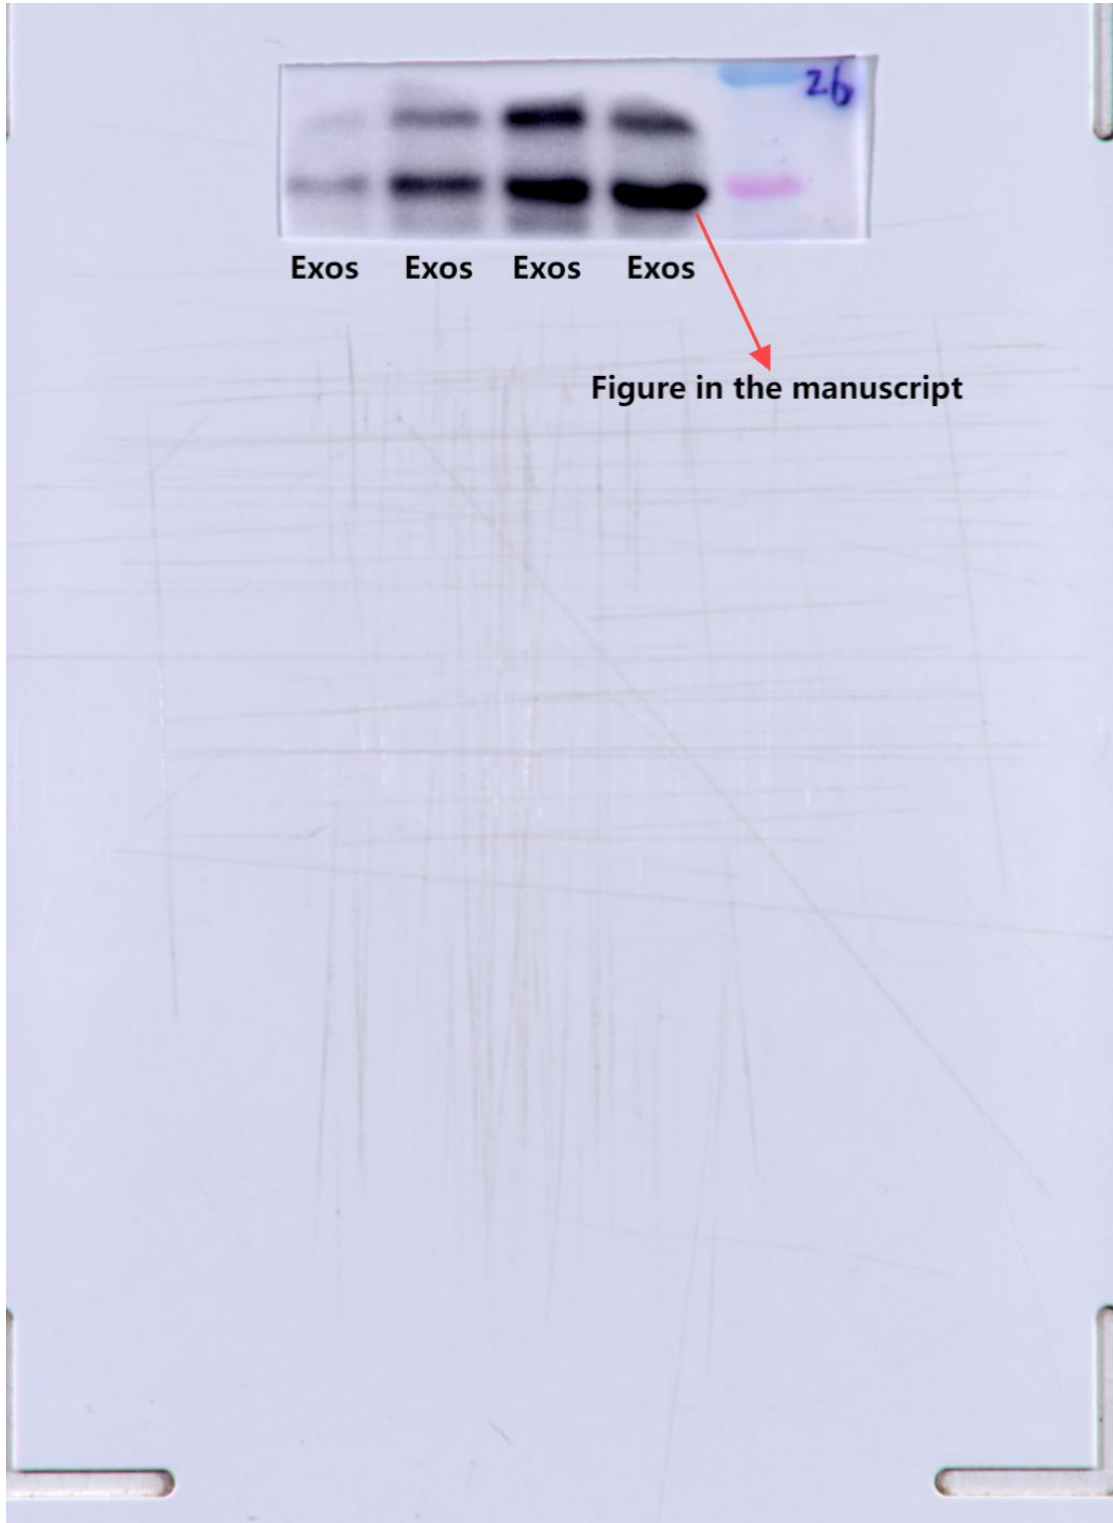

**Figure 2C-Full-length blots of CD9**

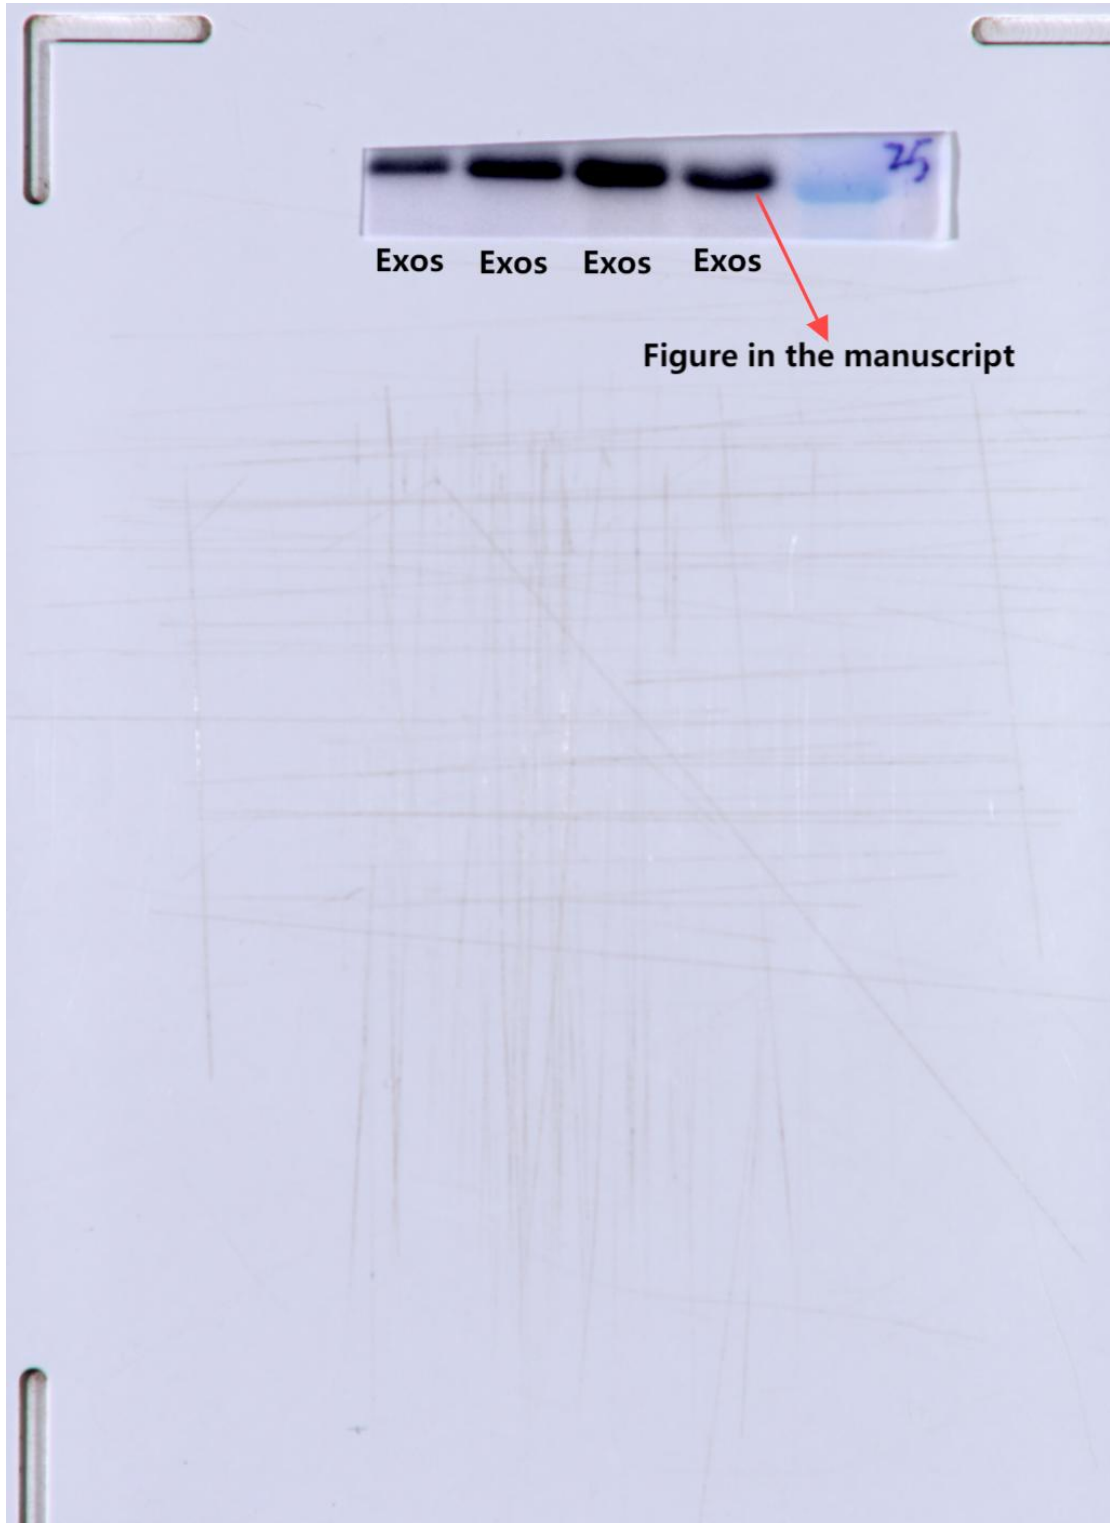

Figure 2C-Full-length blots of CD63

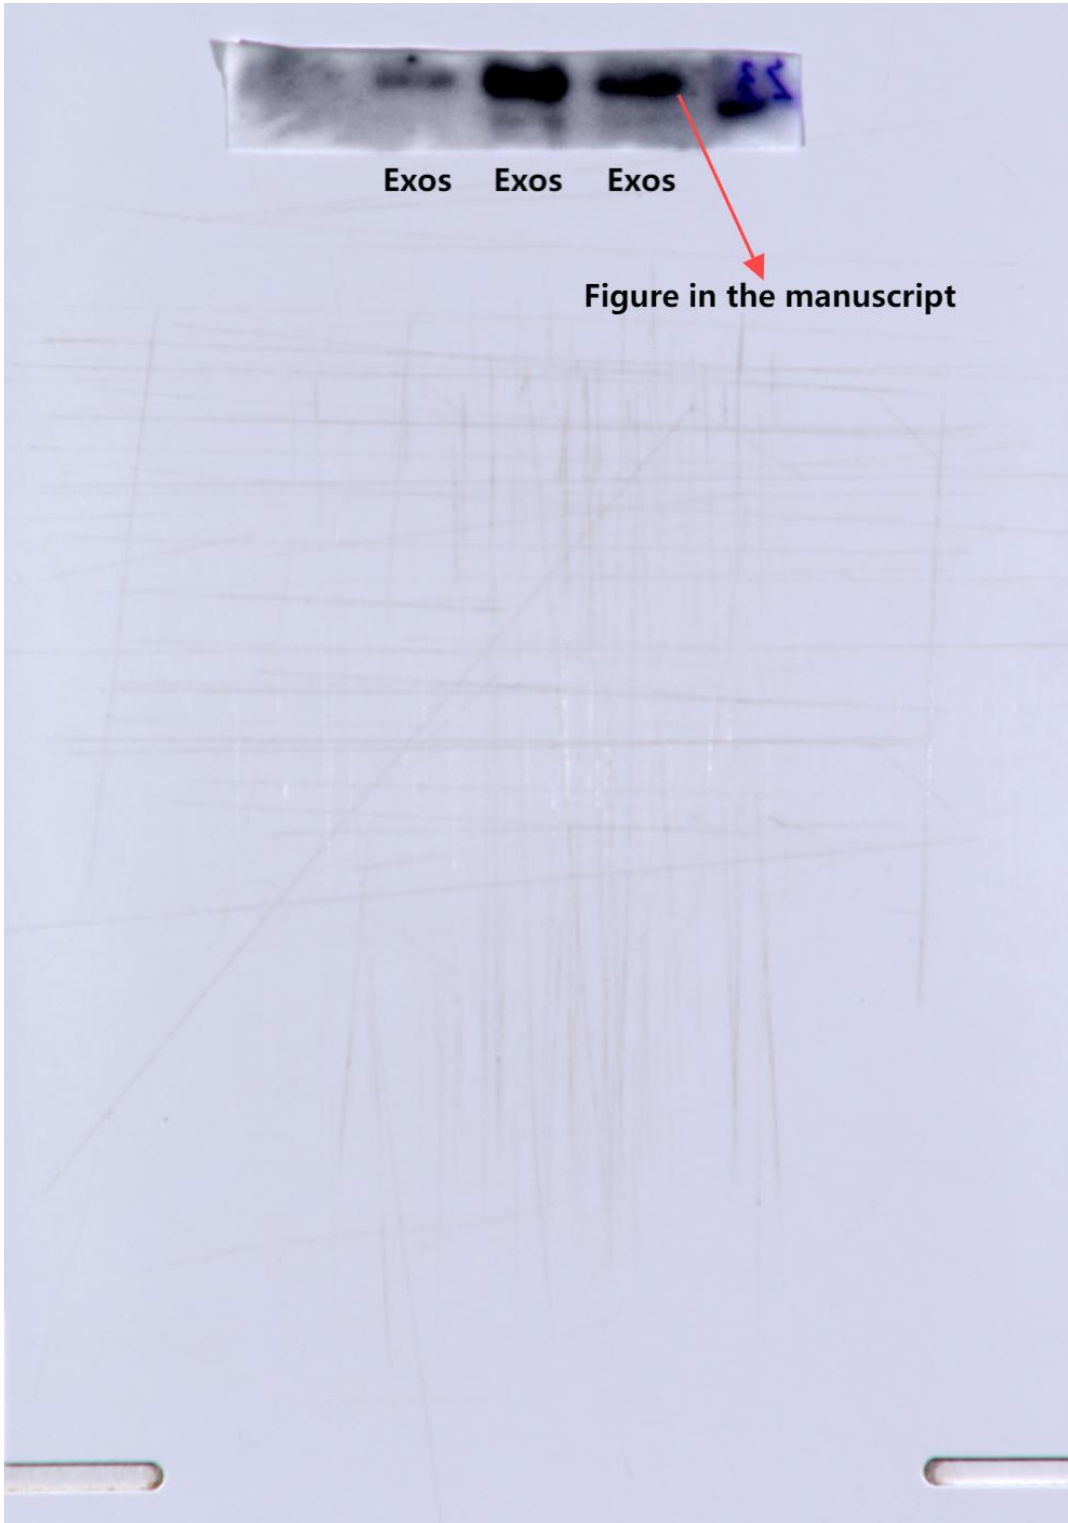

Figure 2C-Full-length blots of CD81

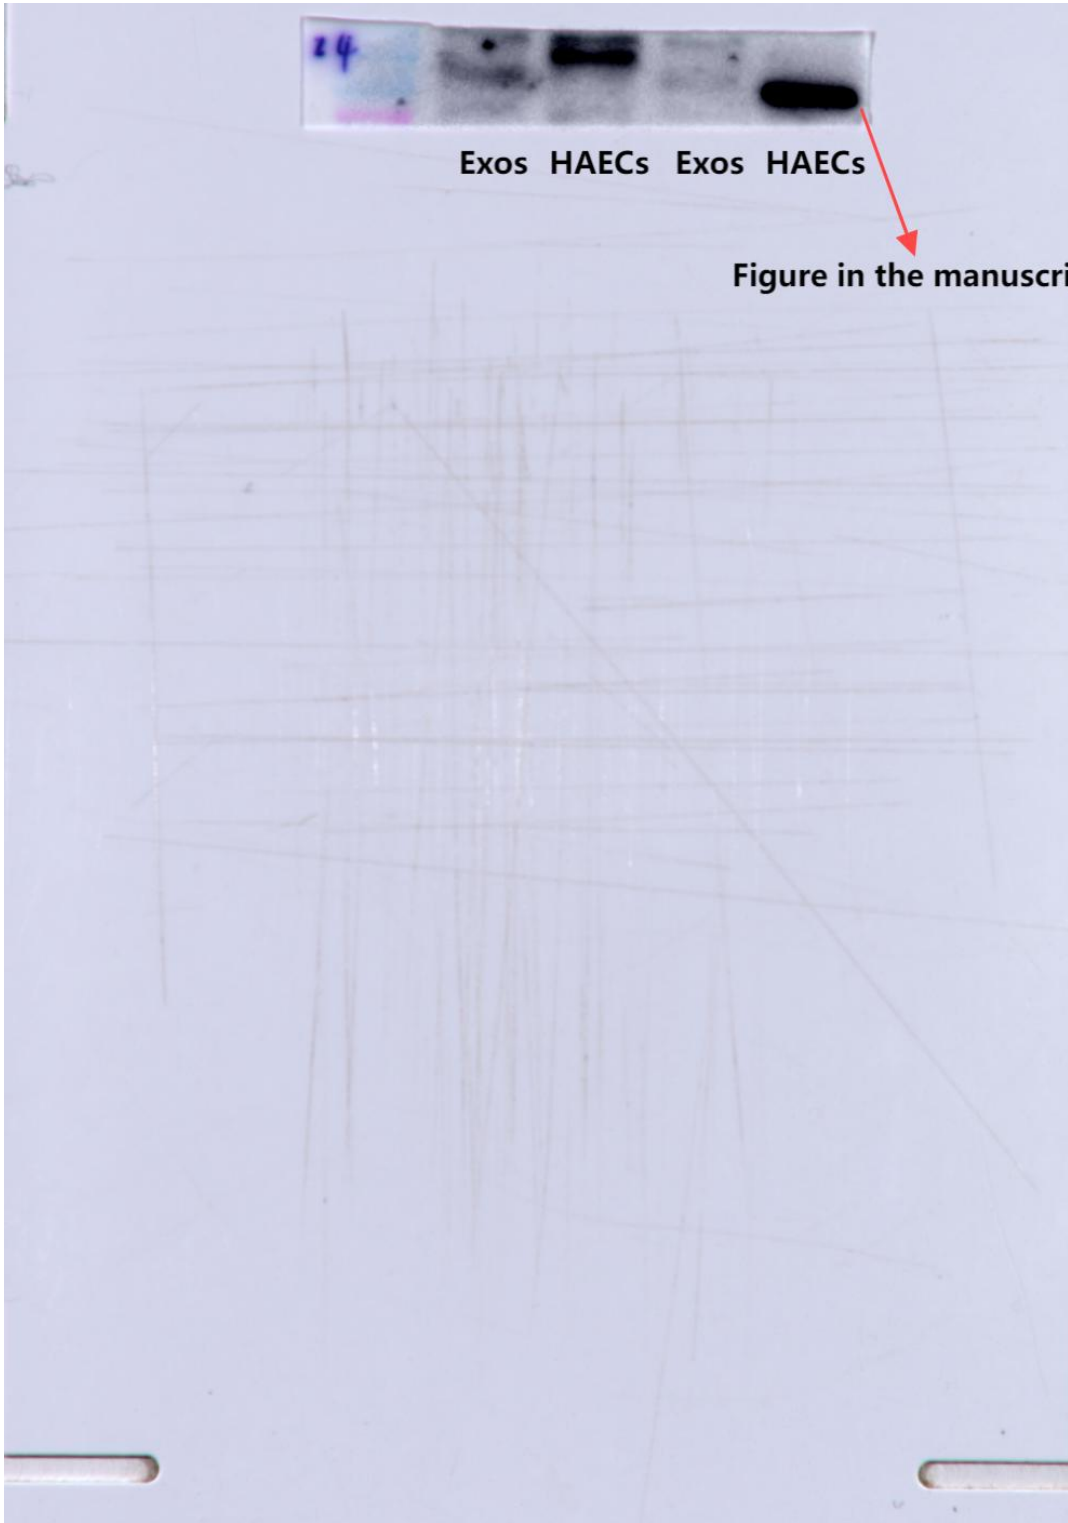

Figure 2C-Full-length blots of Calnexin

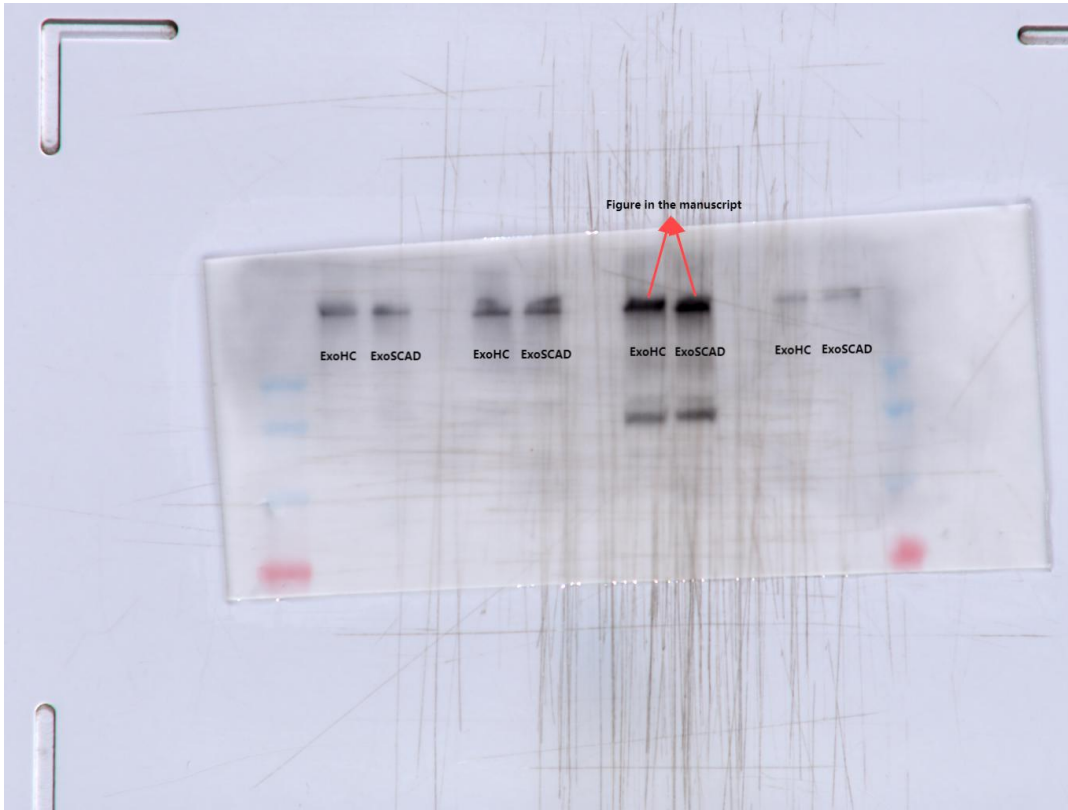

**Figure 2D-Full-length blots of ApoB**

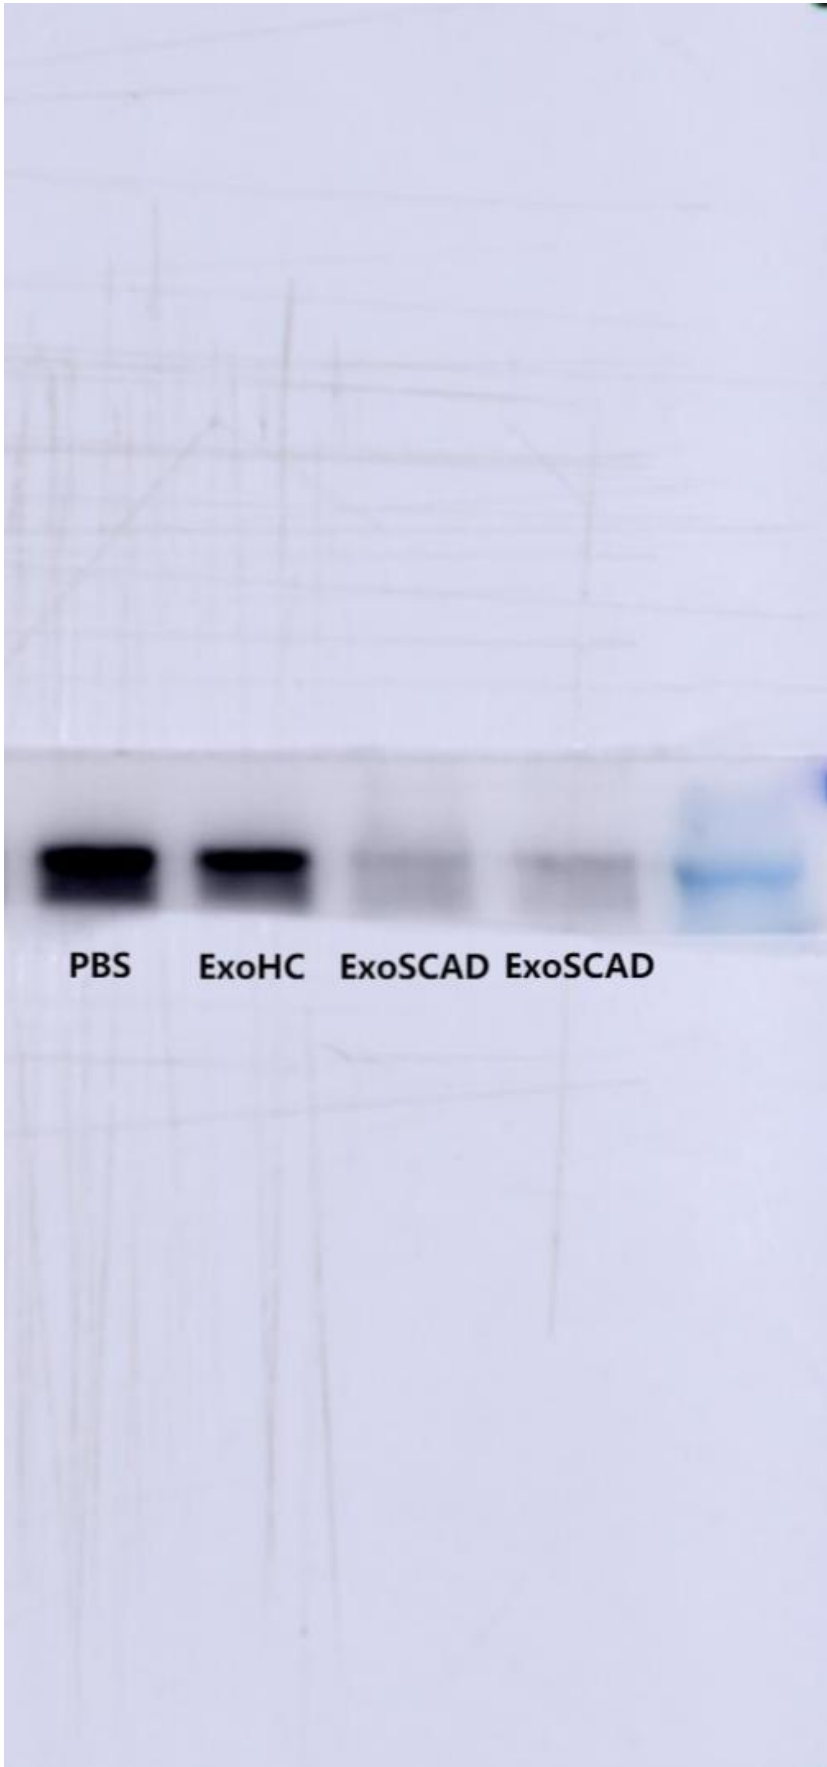

**Figure 3A-Full-length blots of ZO-1**

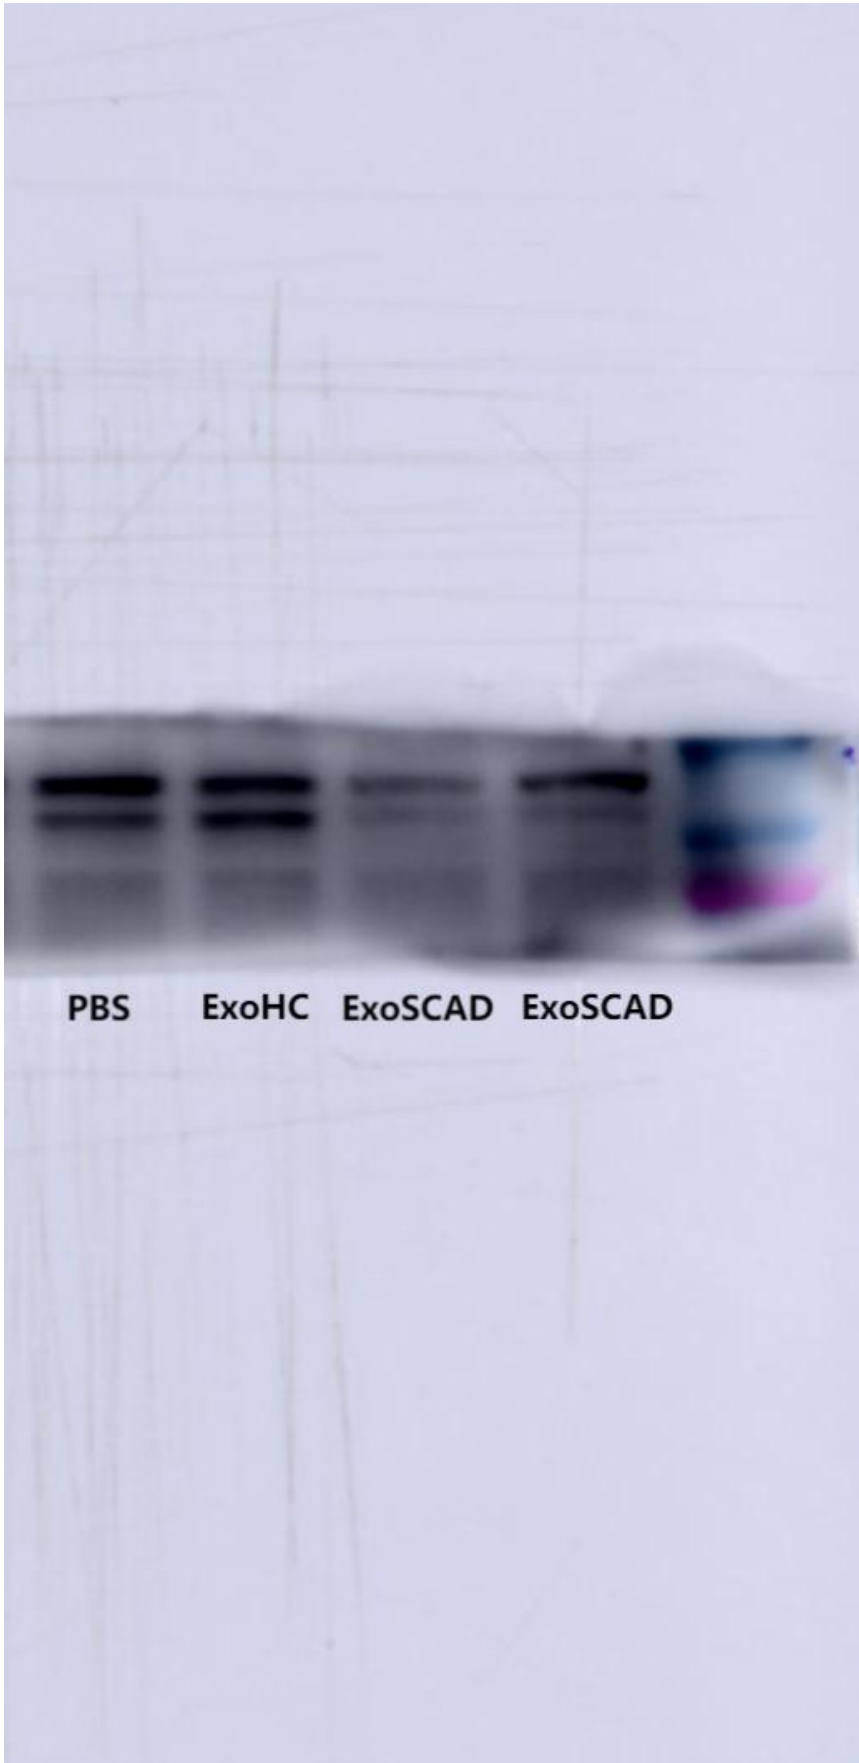

**Figure 3A-Full-length blots of VE-Cad**

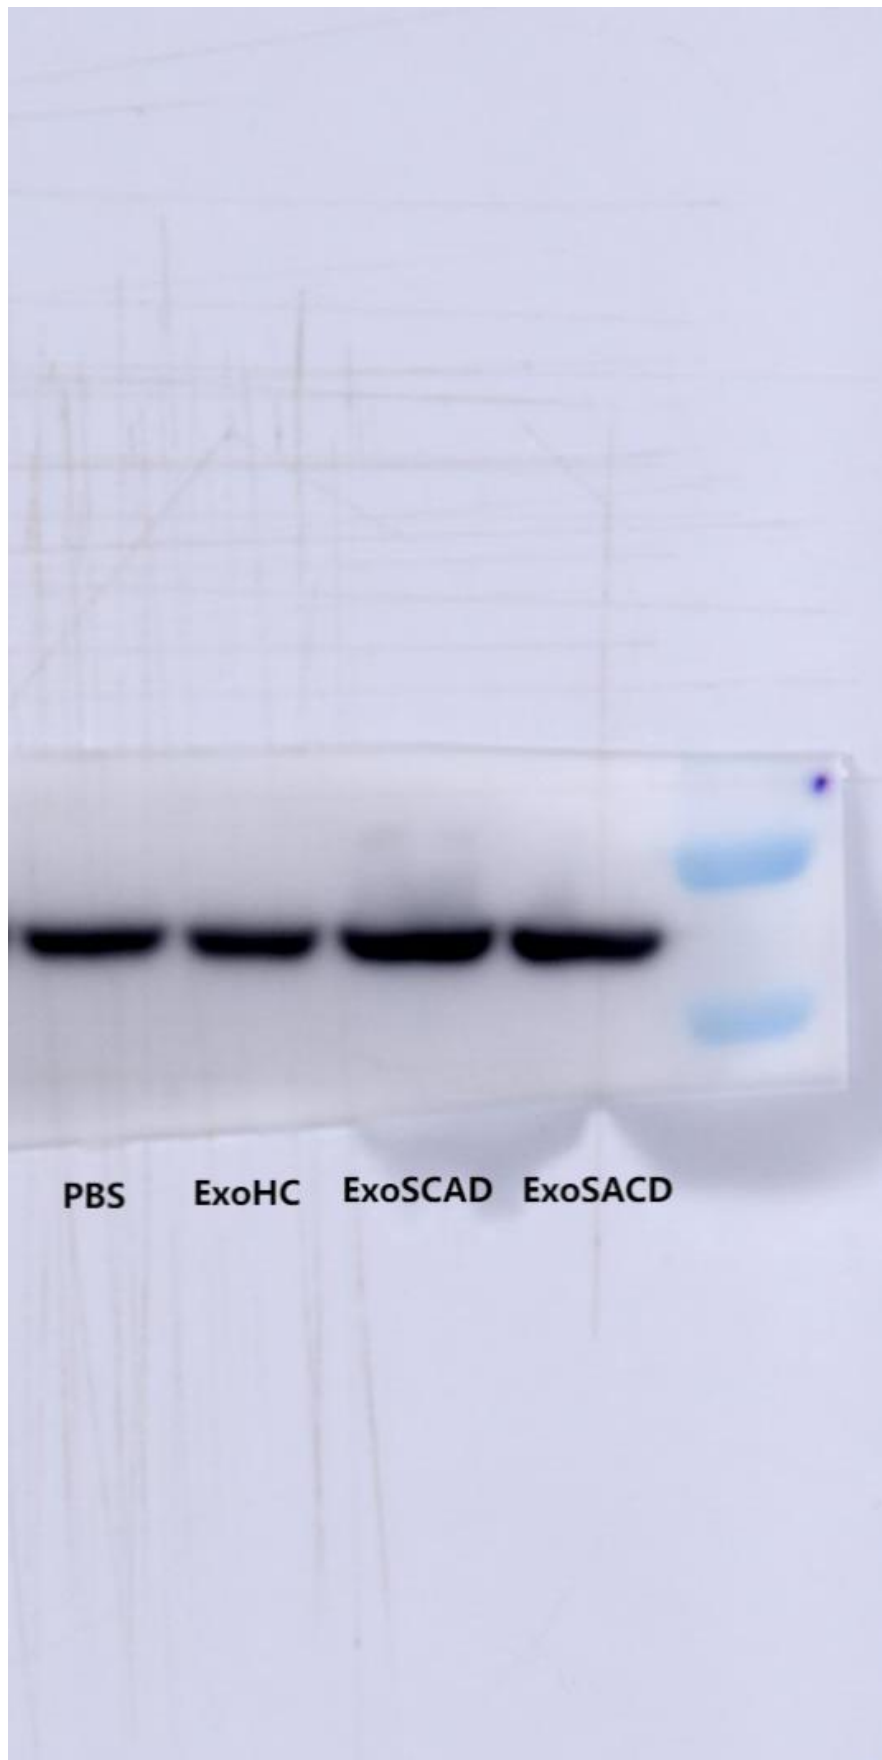

Figure 3A-Full-length blots of  $\beta$ -actin



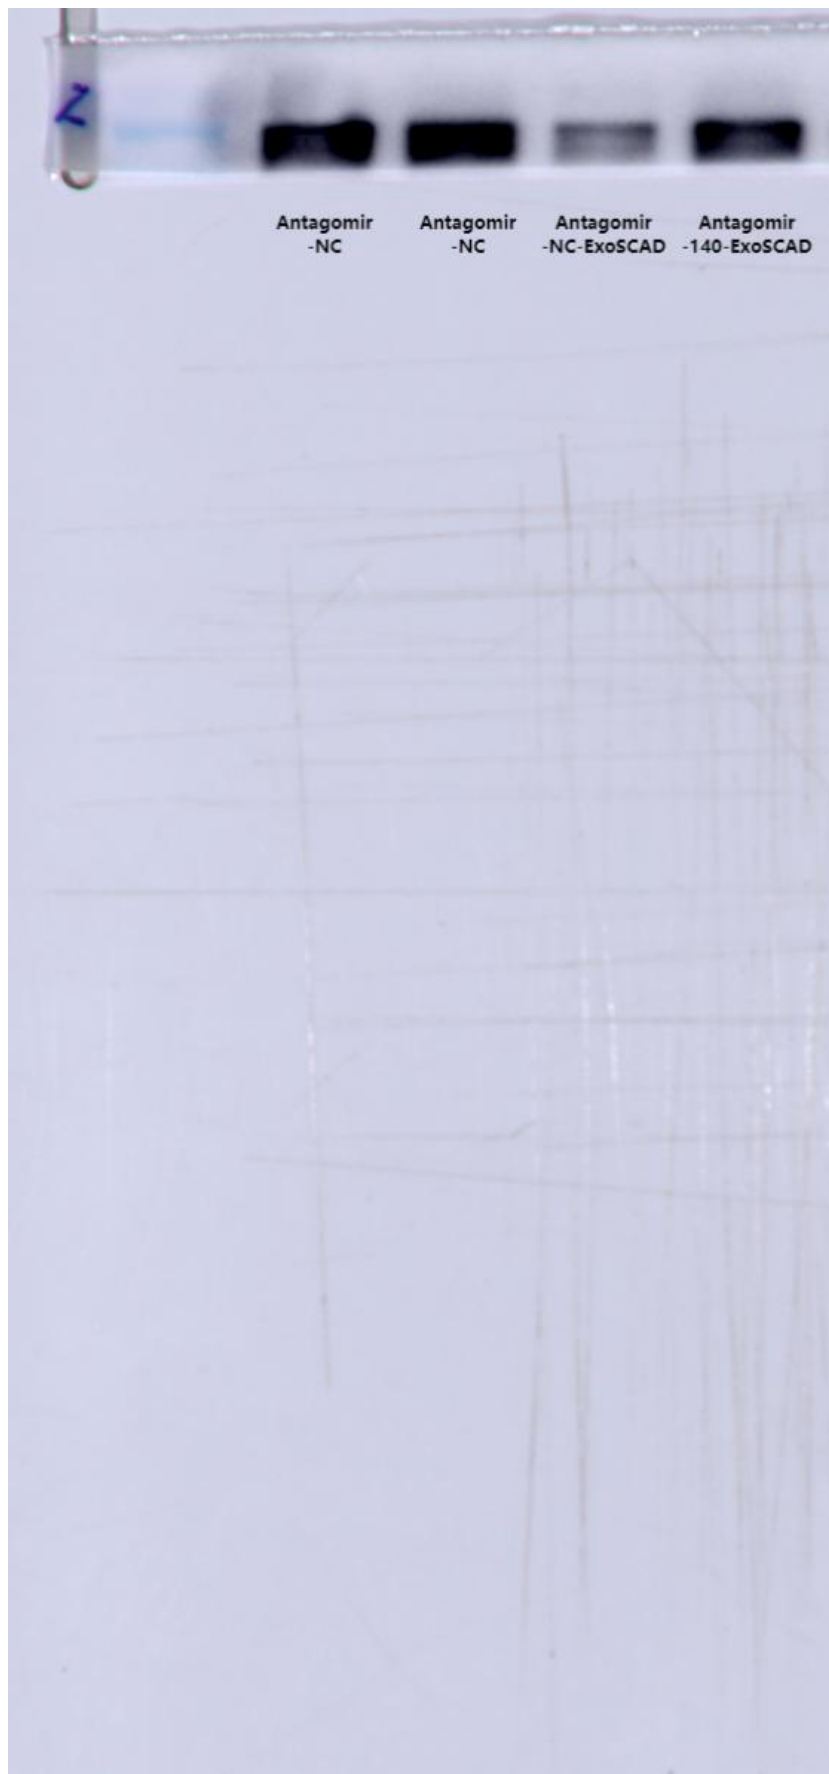

**Figure 4C-Full-length blots of ZO-1**

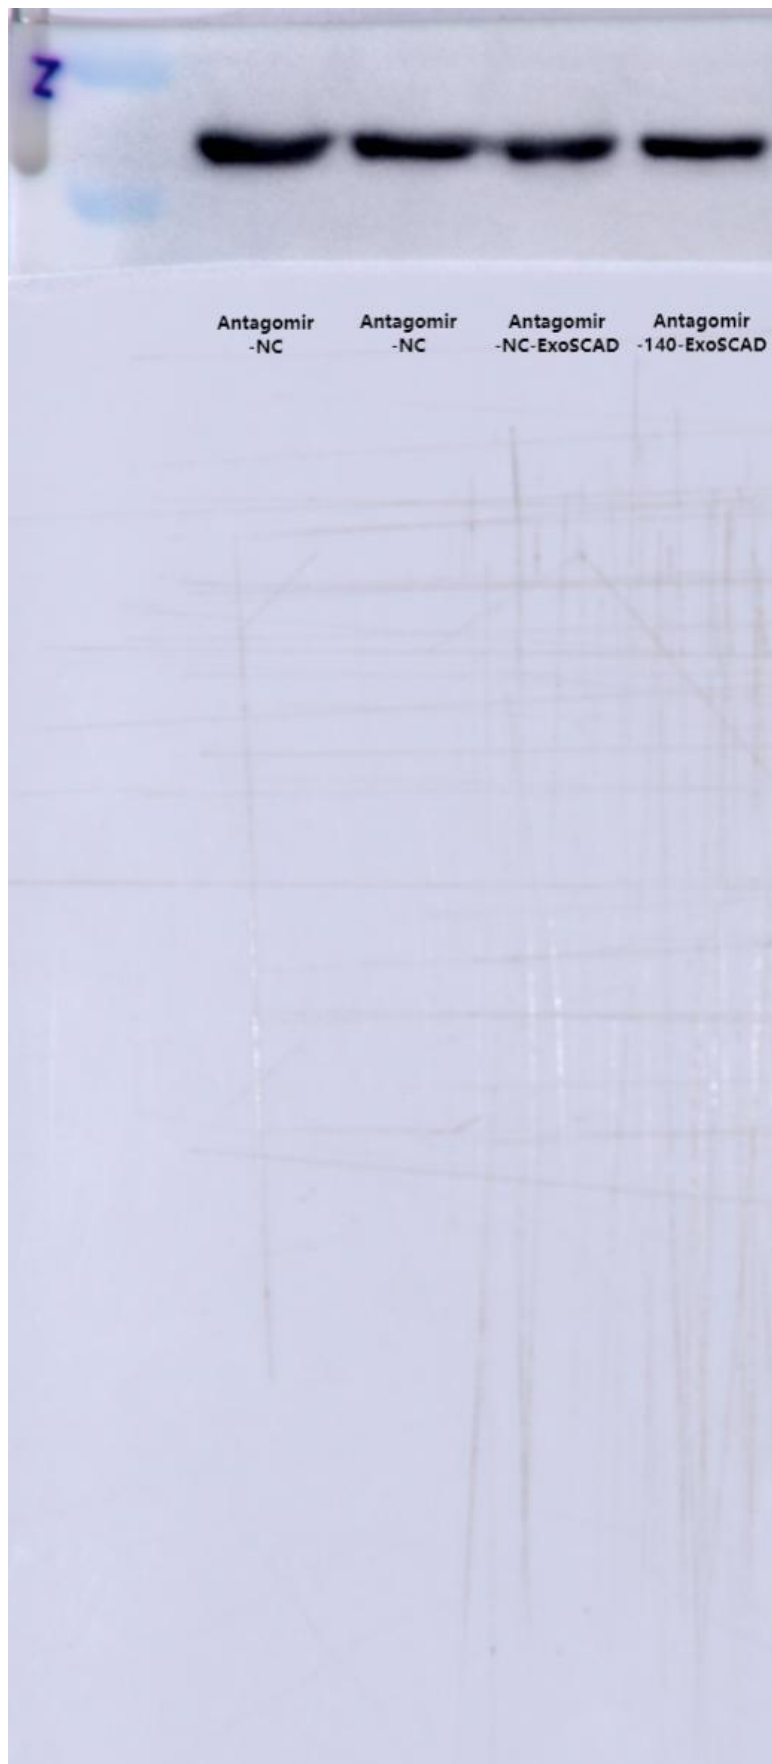

Figure 4C-Full-length blots of  $\beta$ -actin

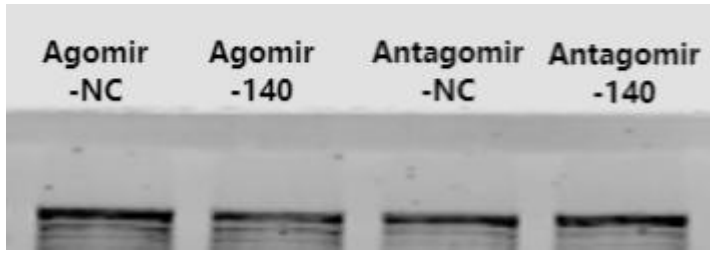

**Figure 5A-Full-length blots of ZO-1**

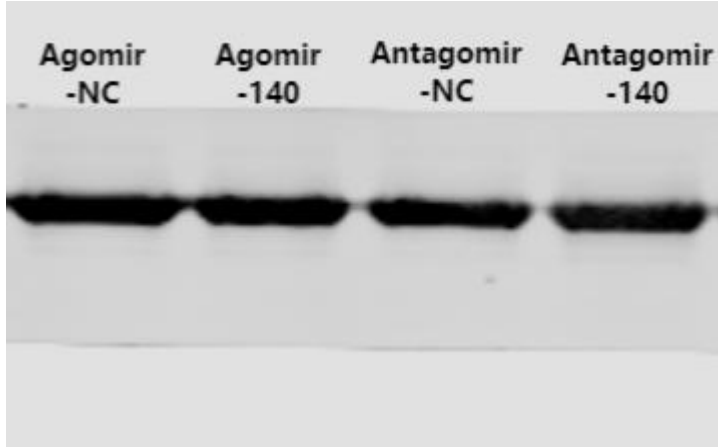

**Figure 5A-Full-length blots of  $\beta$ -actin**
